# Supplementary material for: Reverse thioether ligation route to multimeric peptide antigens
Source: Royal Society of Chemistry journal article supplement (doi:10.1039/c2ob06819b), 2012-01-01

## ELECTRONIC SUPPLEMENTARY INFORMATION TO

### Reverse thioether ligation route to multimeric peptide antigens

*Marta Monsó, Wioleta Kowalczyk, David Andreu\* and Beatriz G. de la Torre\**

HPLC traces of Table 1 compounds. Experimental conditions as given in Table 1.

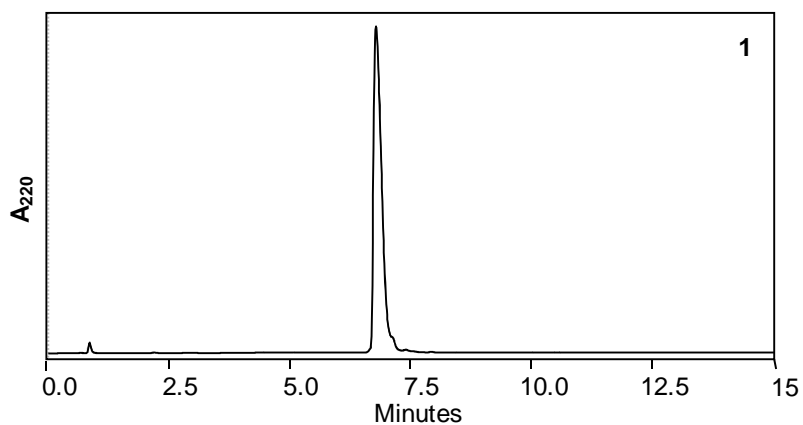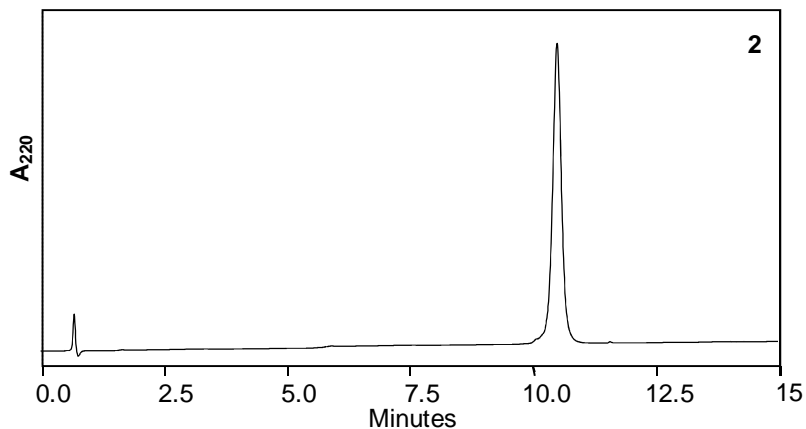

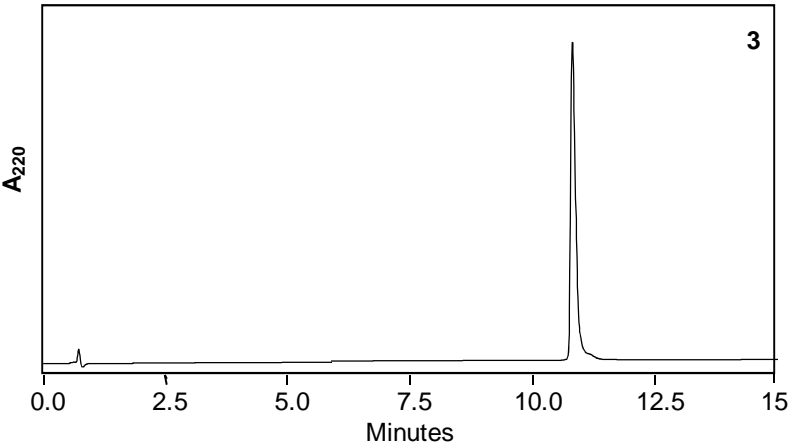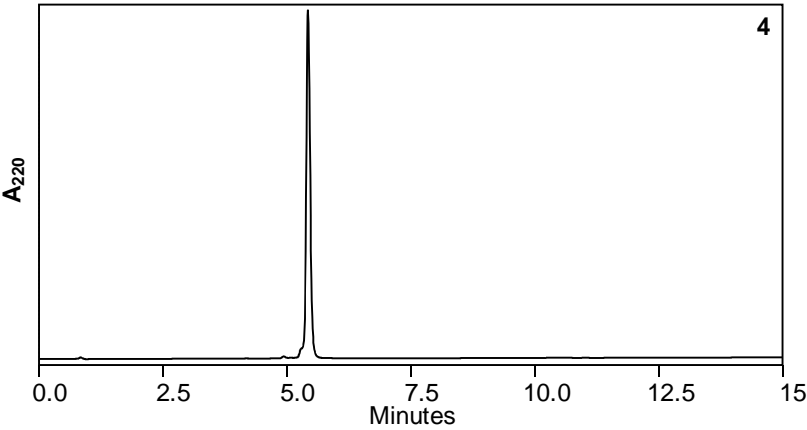

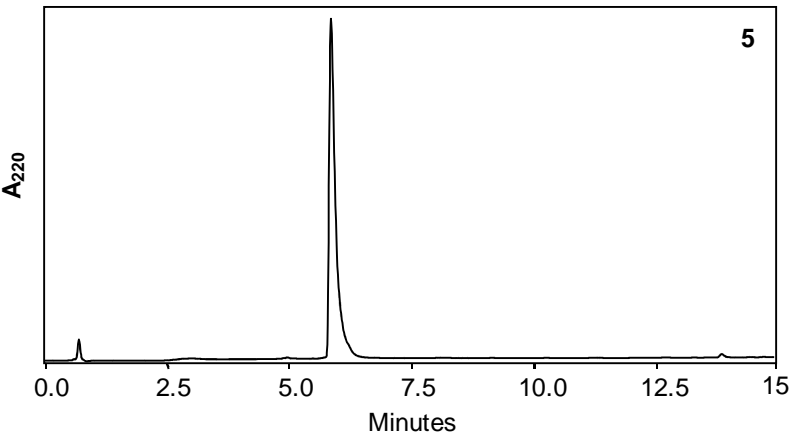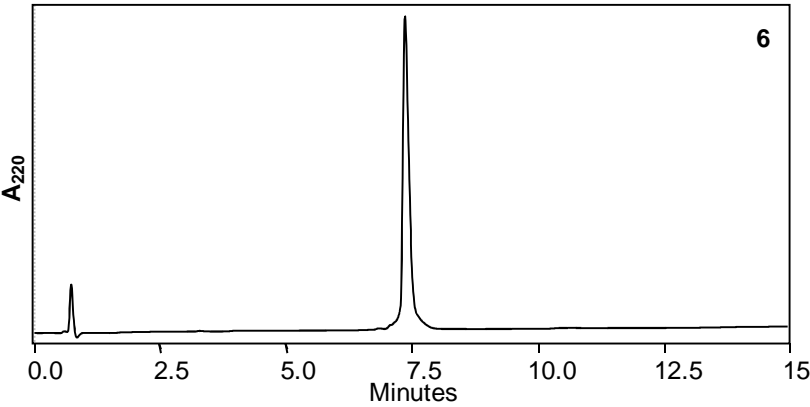

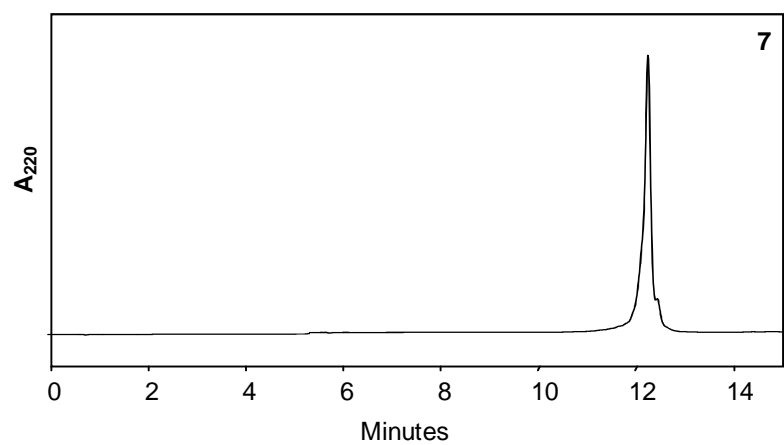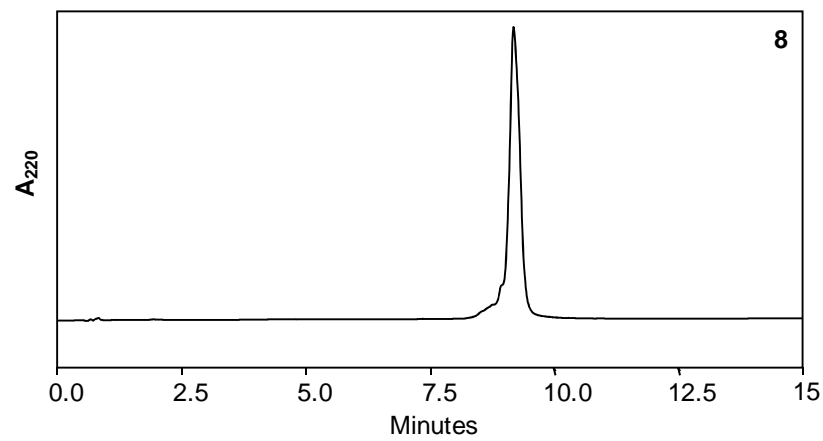

Supplement: c2ob06819b.pdf [file c2ob06819b.pdf]
